# Supplementary material for: Regime Shift in Sandy Beach Microbial Communities following Deepwater Horizon Oil Spill Remediation Efforts
Source: PubMed Central journal article supplement (PMC4103866; doi:10.1371/journal.pone.0102934), 2014-07-18

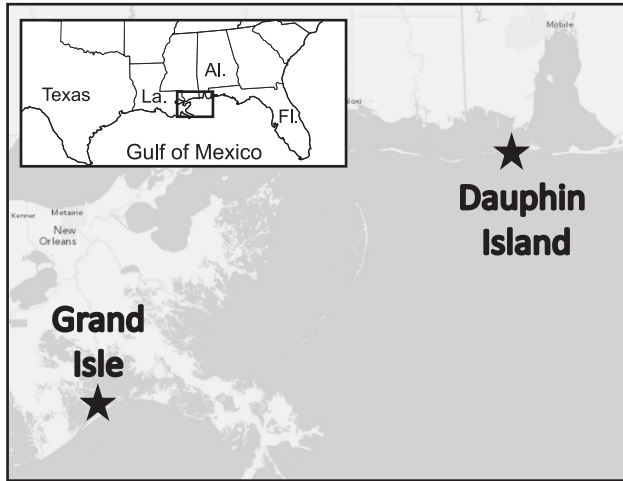

Supplement: pone.0102934.s001.pdf [file pone.0102934.s001.pdf]
