# Supplementary material for: Regime Shift in Sandy Beach Microbial Communities following Deepwater Horizon Oil Spill Remediation Efforts
Source: PubMed Central journal article supplement (PMC4103866; doi:10.1371/journal.pone.0102934), 2014-07-18
Supplement: pone.0102934.s008.pdf [file pone.0102934.s008.pdf]

**Table S1. Location and physicochemical data for each of the sediment samples collected from Grand Isle, Louisiana, and Dauphin Island, Alabama, 2010-2011. Grand Isle samples are shaded in gray. N.M. = not measured.**

| Sample Code  | Latitude      | Longitude     | Sampling Date | Sediment pH | Average Water Content (%) (± S.D.) | Average Organic Carbon Content (%) (± S.D.) |
|--------------|---------------|---------------|---------------|-------------|------------------------------------|---------------------------------------------|
| HOR-10-03A   | 30° 14' 40.1" | 88° 07' 27.5" | 05-02-10      | 8.22        | 2.86 (0.03)                        | 2.82 (0.01)                                 |
| HOR-10-03B   |               |               |               |             |                                    |                                             |
| HOR-10-03C   |               |               |               |             |                                    |                                             |
| HOR-10-06A   | 30° 14' 40.1" | 88° 07' 29.0" | 05-02-10      | 6.08        | 12.63 (0.04)                       | 0.39 (0.01)                                 |
| HOR-10-06B   |               |               |               |             | 18.68 (0.08)                       | 0.18 (0.004)                                |
| HOR-10-07B   | 30° 14' 39.9" | 88° 07' 29.5" | 05-02-10      | 6.26        | 6.64                               | 0.11                                        |
| HOR-10-18A   | 29° 16' 05.8" | 89° 57' 08.6" | 05-22-10      | 8.36        | 2.56 (0.77)                        | 0.16 (0.02)                                 |
| HOR-10-18B   |               |               |               | 8.62        | 4.50 (0.25)                        | 0.34 (0.005)                                |
| HOR-10-20A   | 29° 16' 06.2" | 89° 57' 07.8" | 05-22-10      | 7.33        | 17.26 (0.37)                       | 0.32 (0.003)                                |
| HOR-10-20B   |               |               |               | 7.57        | 21.88 (0.46)                       | 0.93 (0.005)                                |
| HOR-10-21B   | 29° 16' 06.1" | 89° 57' 07.8" | 05-22-10      | 7.60        | 18.79 (0.39)                       | 0.07 (0.05)                                 |
| HOR-10-23A   | 30° 14' 39.6" | 88° 07' 27.1" | 06-01-10      | 6.7         | 2.19 (0.31)                        | 0.07 (0.002)                                |
| HOR-10-23B   |               |               |               | 8.38        | 4.89 (0.79)                        | 0.04 (0.005)                                |
| HOR-10-23C   |               |               |               | 7.91        | 4.72 (0.52)                        | 0.04 (0.01)                                 |
| HOR-10-24A   | 30° 14' 39.5" | 88° 07' 27.5" | 06-01-10      | 8.55        | 0.07 (0.04)                        | 0.21 (0.25)                                 |
| HOR-10-24B   |               |               |               | 6.37        | 4.95 (0.68)                        | 0.03 (0.01)                                 |
| HOR-10-24C   |               |               |               | 7.03        | 3.29 (0.56)                        | 0.04 (0.05)                                 |
| HOR-10-25A   | 30° 14' 39.4" | 88° 07' 28.1" | 06-01-10      | 7.63        | 0.03 (0.00)                        | 0.02 (0.01)                                 |
| HOR-10-25B   |               |               |               | 7.59        | 4.45 (0.17)                        | 0.01 (0.01)                                 |
| HOR-10-25C   |               |               |               | 8.24        | 7.25 (0.15)                        | 0.02 (0.003)                                |
| HOR-10-26A   | 30° 14' 39.2" | 88° 07' 28.6" | 06-01-10      | 9.04        | 0.02 (0.00)                        | 0.03 (0.02)                                 |
| HOR-10-26B   |               |               |               | 7.70        | 2.80 (0.50)                        | 0.02 (0.004)                                |
| HOR-10-26C   |               |               |               | 7.41        | 4.35 (0.34)                        | 0.02 (0.007)                                |
| HOR-10-27A   | 30° 14' 39.1" | 88° 07' 29.1" | 06-01-10      | 7.86        | 0.12 (0.08)                        | 0.04 (0.01)                                 |
| HOR-10-27B   |               |               |               | 8.27        | 4.51 (0.64)                        | 0.04 (0.001)                                |
| HOR-10-27C   |               |               |               | 8.71        | 4.23 (0.36)                        | 0.04 (0.01)                                 |
| HOR-10-28A   | 30° 14' 39.1" | 88° 07' 29.3" | 06-01-10      | 8.08        | 9.18 (0.12)                        | 0.11 (0.01)                                 |
| HOR-10-28B   |               |               |               | 8.40        | 12.94 (0.61)                       | 0.10 (0.01)                                 |
| HOR-10-28C   |               |               |               | 7.90        | 15.56 (0.22)                       | 0.11 (0.005)                                |
| HOR-10-28oil | 30° 14' 39.1" | 88° 07' 29.3" | 06-01-10      | N.M.        | 14.61 (0.45)                       | 1.66 (0.87)                                 |

| Sample Code | Latitude       | Longitude      | Sampling Date | Sediment pH | Average Water Content (%) ( $\pm$ S.D.) | Average Organic Carbon Content (%) ( $\pm$ S.D.) |
|-------------|----------------|----------------|---------------|-------------|-----------------------------------------|--------------------------------------------------|
| HOR-10-30A  | 30° 14' 39.2"  | 88° 07' 27.25" | 08-14-10      | 7.37        | 0.99 (0.51)                             | 0.03 (0.01)                                      |
| HOR-10-30B  |                |                |               | 7.65        | 4.12 (0.41)                             | 0.03 (0.01)                                      |
| HOR-10-30C  |                |                |               | 7.43        | 6.52 (0.06)                             | 0.02 (0.004)                                     |
| HOR-10-33A  | 30° 14' 38.56" | 88° 07' 29.39" | 08-14-10      | 6.69        | 4.88 (0.1)                              | 0.51 (0.01)                                      |
| HOR-10-33B  |                |                |               | 7.85        | 2.52 (0.18)                             | 0.18 (0.001)                                     |
| HOR-10-33C  |                |                |               | 7.23        | 3.30 (0.11)                             | 0.32 (0.06)                                      |
| HOR-10-34A  | 30° 14' 38.46" | 88° 07' 29.6"  | 08-14-10      | 6.99        | 0.35 (0.08)                             | 0.18 (0.06)                                      |
| HOR-10-34B  |                |                |               | 6.57        | 14.73 (0.19)                            | 0.31 (0.41)                                      |
| HOR-10-34C  |                |                |               | 6.89        | 3.20 (0.09)                             | 0.05 (0.02)                                      |
| HOR-10-39A  | 29° 16' 08.5"  | 89° 57' 12.4"  | 08-15-10      | 7.90        | 13.00 (0.25)                            | 0.25 (0.03)                                      |
| HOR-10-39B  |                |                |               | 8.30        | 13.00 (0.17)                            | 0.17 (0.01)                                      |
| HOR-10-42A  | 29° 16' 09.8"  | 89° 57' 12.3"  | 08-15-10      | 8.18        | 14.29 (0.09)                            | 0.20 (0.04)                                      |
| HOR-10-42B  |                |                |               | 7.89        | 16.58 (1.13)                            | 0.82 (0.49)                                      |
| HOR-10-43A  | 29° 16' 10.4"  | 89° 57' 11.2"  | 08-15-10      | 7.89        | 16.94 (0.08)                            | 0.28 (0.13)                                      |
| HOR-10-53A  | 30° 14' 40.4"  | 88° 07' 27.1"  | 12-10-10      | 7.49        | 0.05 (0.03)                             | 0.02 (0.001)                                     |
| HOR-10-53B  |                |                |               | 7.43        | 0.83 (0.11)                             | 0.01 (0.002)                                     |
| HOR-10-53C  |                |                |               | 7.10        | 2.21                                    | 0.05                                             |
| HOR-10-54A  | 30° 14' 40.1"  | 88° 07' 27.9"  | 12-10-10      | 7.62        | 0.04 (0.02)                             | 0.04 (0.004)                                     |
| HOR-10-54B  |                |                |               | 7.35        | 2.05 (0.56)                             | 0.06 (0.05)                                      |
| HOR-10-54C  |                |                |               | 7.21        | 2.33 (0.39)                             | 0.04 (0.02)                                      |
| HOR-10-48A  | 30° 14' 39.9"  | 88° 07' 30.9"  | 12-10-10      | 9.03        | 2.62 (0.44)                             | 0.57 (0.02)                                      |
| HOR-10-48B  |                |                |               | 8.07        | 2.91 (0.06)                             | 1.27 (0.009)                                     |
| HOR-10-48C  |                |                |               | 8.22        | 5.81 (0.1)                              | 1.34 (0.07)                                      |
| HOR-10-49A  | 30° 14' 39.1"  | 88° 07' 32.6"  | 12-10-10      | 7.04        | 0.04 (0.003)                            | 0.04 (0.006)                                     |
| HOR-10-49B  |                |                |               | 7.92        | 4.09 (0.1)                              | 0.1 (0.005)                                      |
| HOR-10-49C  |                |                |               | 7.31        | 6.97 (0.07)                             | 0.93 (0.009)                                     |
| HOR-10-50A  | 30° 14' 38.5"  | 88° 07' 33.6"  | 12-10-10      | 7.37        | 0.04 (0.05)                             | 0.02 (0.002)                                     |
| HOR-10-50B  |                |                |               | 6.80        | 3.74 (0.04)                             | 0.23 (0.01)                                      |
| HOR-10-50C  |                |                |               | 7.33        | 6.06                                    | 0.04                                             |
| HOR-10-51A  | 30° 14' 38.4"  | 88° 07' 33.9"  | 12-10-10      | 7.76        | 17.56 (0.37)                            | 0.11 (0.002)                                     |
| HOR-10-51B  |                |                |               | 7.57        | 15.55                                   | 0.07                                             |
| HOR-10-52A  | 30° 14' 38.2"  | 88° 07' 34.0"  |               | 7.38        | 17.48 (0.24)                            | 0.13 (0.005)                                     |
| HOR-11-73A  | 29° 16' 09.3"  | 89° 57' 13.4"  | 05-14-11      | 7.17        | 0.04 (0.01)                             | 0.34 (0.02)                                      |
| HOR-11-73B  |                |                |               | 7.50        | 0.21 (0.003)                            | 0.36 (0.009)                                     |
| HOR-11-73C  |                |                |               | 7.49        | 0.21 (0.01)                             | 0.33 (0.02)                                      |

Table S1

| Sample Code | Latitude      | Longitude     | Sampling Date | Sediment pH | Average Water Content (%) ( $\pm$ S.D.) | Average Organic Carbon Content (%) ( $\pm$ S.D.) |
|-------------|---------------|---------------|---------------|-------------|-----------------------------------------|--------------------------------------------------|
| HOR-11-74A  | 29° 16' 09.4" | 89° 57' 13.7" | 05-14-11      | 7.32        | 0.07 (0.008)                            | 0.48 (0.04)                                      |
| HOR-11-74B  |               |               |               | 7.99        | 1.19 (0.72)                             | 0.24 (0.02)                                      |
| HOR-11-74C  |               |               |               | 7.95        | 1.82 (0.77)                             | 0.24 (0.002)                                     |
| HOR-11-75A  | 29° 16' 09.6" | 89° 57' 13.6" | 05-14-11      | 8.85        | 5.98 (0.08)                             | 0.52 (0.04)                                      |
| HOR-11-75B  |               |               |               | 8.18        | 15.37 (0.18)                            | 0.35 (0.03)                                      |
| HOR-11-75C  |               |               |               | 8.11        | 15.50 (1.02)                            | 0.32 (0.03)                                      |
| HOR-11-76A  | 29° 16' 09.9" | 89° 57' 13.0" | 05-14-11      | 7.50        | 9.85 (0.52)                             | 0.79 (0.02)                                      |
| HOR-11-76B  |               |               |               | 7.71        | 13.92 (0.59)                            | 0.26 (0.10)                                      |
| HOR-11-76C  |               |               |               | 7.44        | 13.65 (0.42)                            | 0.59 (0.65)                                      |
| HOR-11-77A  | 29° 16' 10.0" | 89° 57' 11.1" | 05-14-11      | 7.48        | 11.82 (0.15)                            | 1.51 (0.19)                                      |
| HOR-11-77B  |               |               |               | 7.59        | 16.07 (0.85)                            | 0.61 (0.03)                                      |
| HOR-11-77C  |               |               |               | 7.68        | 14.98 (0.29)                            | 0.57 (0.03)                                      |
| HOR-11-78A  | 29° 16' 10.3" | 89° 57' 10.7" | 05-14-11      | 7.33        | 6.08 (0.04)                             | 1.14 (0.08)                                      |
| HOR-11-78B  |               |               |               | 7.63        | 13.79 (0.49)                            | 0.30 (0.006)                                     |
| HOR-11-78C  |               |               |               | 7.81        | 15.10 (0.19)                            | 0.39 (0.07)                                      |
| HOR-11-79A  | 29° 16' 10.3" | 89° 57' 10.1" | 05-14-11      | 7.20        | 10.98 (0.15)                            | 0.24 (0.02)                                      |
| HOR-11-79B  |               |               |               | 7.12        | 16.40 (0.20)                            | 0.23 (0.005)                                     |
| HOR-11-79C  |               |               |               | 7.07        | 22.61 (8.10)                            | 0.21 (0.008)                                     |
| HOR-11-80A  | 29° 16' 10.4" | 89° 57' 09.9" | 05-14-11      | 7.43        | 34.81 (8.46)                            | 0.30 (0.05)                                      |
| HOR-11-80B  |               |               |               | 7.49        | 15.58 (0.53)                            | 0.23 (0.02)                                      |
| HOR-11-58A  | 30° 14' 35.5" | 88° 07' 25.6" | 05-13-11      | 6.84        | 0.04 (0.01)                             | 0.02 (0.005)                                     |
| HOR-11-58B  |               |               |               | 6.78        | 11.99 (1.16)                            | 0.02 (0.008)                                     |
| HOR-11-58C  |               |               |               | 7.02        | 0.07 (0.01)                             | 0.02 (0.001)                                     |
| HOR-11-59A  | 30° 14' 35.3" | 88° 07' 26.1" | 05-13-11      | 6.76        | 0.05 (0.007)                            | 0.02 (0.005)                                     |
| HOR-11-59B  |               |               |               | 6.28        | 2.34 (0.52)                             | 0.01 (0.007)                                     |
| HOR-11-59C  |               |               |               | 6.36        | 2.56 (2.16)                             | 0.02 (0.007)                                     |
| HOR-11-60A  | 30° 14' 34.9" | 88° 07' 27.1" | 05-13-11      | 6.95        | 0.06 (0.004)                            | 0.05 (0.06)                                      |
| HOR-11-60B  |               |               |               | 6.60        | 3.16 (0.63)                             | 0.03 (0.004)                                     |
| HOR-11-60C  |               |               |               | 6.37        | 4.17 (0.09)                             | 0.03 (0.005)                                     |
| HOR-11-62A  | 30° 14' 34.5" | 88° 07' 27.7" | 05-13-11      | 8.62        | 11.63 (0.17)                            | 0.12 (0.03)                                      |
| HOR-11-62B  |               |               |               | 7.96        | 15.08 (0.71)                            | 0.13 (0.04)                                      |
| HOR-11-62C  |               |               |               | 7.48        | 14.72 (0.41)                            | 0.11 (0.04)                                      |
| HOR-11-63A  | 30° 14' 34.1" | 88° 07' 28.4" | 05-13-11      | 8.58        | 11.06 (0.02)                            | 0.08 (0.01)                                      |
| HOR-11-63B  |               |               |               | 7.80        | 15.61 (0.22)                            | 0.14 (0.01)                                      |
| HOR-11-63C  |               |               |               | 7.43        | 17.59 (1.04)                            | 0.15 (0.01)                                      |

Table S1

| <b>Sample Code</b> | <b>Latitude</b> | <b>Longitude</b> | <b>Sampling Date</b> | <b>Sediment pH</b> | <b>Average Water Content (%) (± S.D.)</b> | <b>Average Organic Carbon Content (%) (± S.D.)</b> |
|--------------------|-----------------|------------------|----------------------|--------------------|-------------------------------------------|----------------------------------------------------|
| HOR-11-64A         | 30° 14' 32.8"   | 88° 07' 30.5"    | 05-13-11             | 7.74               | 14.41 (0.35)                              | 0.15 (0.01)                                        |
| HOR-11-64B         |                 |                  |                      | 7.62               | 16.20 (0.38)                              | 0.18 (0.01)                                        |
| HOR-11-64C         |                 |                  |                      | 7.59               | 16.65 (0.38)                              | 0.15 (0.007)                                       |
| HOR-11-65A         | 30° 14' 32.7"   | 88° 07' 31.2"    | 05-13-11             | 7.71               | 5.03 (0.85)                               | 0.04 (0.00)                                        |
| HOR-11-65B         |                 |                  |                      | 7.33               | 5.68 (0.13)                               | 0.05 (0.002)                                       |
| HOR-11-65C         |                 |                  |                      | 7.60               | 8.69 (0.31)                               | 0.07 (0.004)                                       |
| HOR-11-67A         | 30° 14' 32.2"   | 88° 07' 32.3"    | 05-13-11             | 7.45               | 6.63 (0.32)                               | 0.04 (0.003)                                       |
| HOR-11-67B         |                 |                  |                      | 7.26               | 11.10 (0.26)                              | 0.05 (0.006)                                       |
| HOR-11-67C         |                 |                  |                      | 7.34               | 13.21 (0.56)                              | 0.07 (0.003)                                       |
| HOR-11-68A         | 30° 14' 32.1"   | 88° 07' 32.5"    | 05-13-11             | 7.34               | 20.75 (0.34)                              | 0.09 (0.006)                                       |
| HOR-11-68B         |                 |                  |                      | 7.75               | 14.40 (0.51)                              | 0.09 (0.01)                                        |
| HOR-11-68T         |                 |                  |                      | 7.41               | 6.33 (0.10)                               | 6.77 (0.06)                                        |

Table S1
