# Supplementary material for: Regime Shift in Sandy Beach Microbial Communities following Deepwater Horizon Oil Spill Remediation Efforts
Source: PubMed Central journal article supplement (PMC4103866; doi:10.1371/journal.pone.0102934), 2014-07-18
Supplement: pone.0102934.s009.pdf [file pone.0102934.s009.pdf]

**Table S2. Summary of pyrosequencing data for each of the sediment samples collected from Grand Isle, Louisiana, and Dauphin Island, Alabama, 2010-2011.** Grand Isle samples are shaded in gray. Operational Taxonomic Units (OTUs) and diversity indices were calculated using MOTHUR.

| Sample Code  | Small Read Archive Run Accession Number | Number of Seqs. (raw) | Number of Seqs. After Trimming | Average Seq. Length After Trimming | Chimeric Seq. | % Chimeric | OTUs (96% sequence identity) | Chao1 Index | Shannon Index | Simpson Index |
|--------------|-----------------------------------------|-----------------------|--------------------------------|------------------------------------|---------------|------------|------------------------------|-------------|---------------|---------------|
| HOR-10-03A   | SRR628470                               | 2306                  | 1891                           | 389.4                              | 90            | 4.76%      | 71                           | 82.67       | 3.61          | 0.04          |
| HOR-10-03B   | SRR628471                               | 4004                  | 3231                           | 396.8                              | 299           | 9.25%      | 114                          | 137.75      | 3.93          | 0.04          |
| HOR-10-03C   | SRR628472                               | 2039                  | 1590                           | 385.0                              | 63            | 3.96%      | 91                           | 128.80      | 3.60          | 0.05          |
| HOR-10-06A   | SRR628473                               | 3781                  | 3102                           | 384.2                              | 33            | 1.06%      | 94                           | 121.60      | 3.56          | 0.05          |
| HOR-10-06B   | SRR628474                               | 894                   | 736                            | 383.4                              | 16            | 2.17%      | 28                           | 40.00       | 2.50          | 0.11          |
| HOR-10-07B   | SRR628475                               | 4132                  | 3122                           | 394.1                              | 278           | 8.90%      | 108                          | 121.64      | 3.53          | 0.06          |
| HOR-10-18A   | SRR628476                               | 1982                  | 1439                           | 386.9                              | 39            | 2.71%      | 48                           | 59.00       | 3.03          | 0.07          |
| HOR-10-18B   | SRR628477                               | 6777                  | 5626                           | 381.0                              | 147           | 2.61%      | 158                          | 204.43      | 4.08          | 0.03          |
| HOR-10-20A   | SRR628478                               | 10703                 | 8722                           | 383.5                              | 358           | 4.10%      | 530                          | 632.51      | 5.13          | 0.01          |
| HOR-10-20B   | SRR628479                               | 6635                  | 5441                           | 408.1                              | 138           | 2.54%      | 371                          | 409.13      | 5.18          | 0.01          |
| HOR-10-21B   | SRR628480                               | 11013                 | 7885                           | 359.7                              | 56            | 0.71%      | 218                          | 245.05      | 3.98          | 0.06          |
| HOR-10-23A   | SRR628481                               | 7270                  | 5080                           | 333.5                              | 131           | 2.58%      | 823                          | 1198.47     | 5.86          | 0.01          |
| HOR-10-23B   | SRR628482                               | 5491                  | 3631                           | 387.0                              | 85            | 2.34%      | 647                          | 993.26      | 5.64          | 0.01          |
| HOR-10-23C   | SRR628483                               | 13145                 | 5270                           | 354.6                              | 157           | 2.98%      | 378                          | 511.47      | 4.70          | 0.02          |
| HOR-10-24A   | SRR628484                               | 5739                  | 2689                           | 370.2                              | 93            | 3.46%      | 459                          | 726.12      | 5.34          | 0.01          |
| HOR-10-24B   | SRR628485                               | 13442                 | 4290                           | 374.9                              | 79            | 1.84%      | 527                          | 815.92      | 4.97          | 0.03          |
| HOR-10-24C   | SRR628486                               | 17047                 | 5200                           | 359.2                              | 63            | 1.21%      | 997                          | 1670.39     | 5.90          | 0.01          |
| HOR-10-25A   | SRR628487                               | 15158                 | 5919                           | 364.2                              | 90            | 1.52%      | 1084                         | 1845.88     | 5.90          | 0.01          |
| HOR-10-25B   | SRR628488                               | 11312                 | 5265                           | 371.3                              | 45            | 0.85%      | 501                          | 727.45      | 4.94          | 0.02          |
| HOR-10-25C   | SRR628489                               | 2511                  | 1299                           | 366.0                              | 7             | 0.54%      | 416                          | 954.39      | 5.14          | 0.02          |
| HOR-10-26A   | SRR628490                               | 14575                 | 7798                           | 372.8                              | 52            | 0.67%      | 956                          | 1947.09     | 5.12          | 0.04          |
| HOR-10-26B   | SRR628491                               | 9783                  | 5256                           | 354.4                              | 72            | 1.37%      | 293                          | 368.31      | 4.34          | 0.03          |
| HOR-10-26C   | SRR628492                               | 17116                 | 9631                           | 371.8                              | 82            | 0.85%      | 706                          | 1175.81     | 4.48          | 0.07          |
| HOR-10-27A   | SRR628493                               | 14526                 | 6896                           | 371.1                              | 51            | 0.74%      | 1140                         | 1694.96     | 6.16          | 0.00          |
| HOR-10-27B   | SRR628494                               | 2458                  | 1168                           | 358.3                              | 30            | 2.57%      | 208                          | 503.04      | 4.47          | 0.02          |
| HOR-10-27C   | SRR628495                               | 2825                  | 1256                           | 362.1                              | 7             | 0.56%      | 348                          | 742.83      | 5.14          | 0.01          |
| HOR-10-28A   | SRR628496                               | 13193                 | 6670                           | 306.5                              | 1215          | 18.22%     | 1521                         | 2547.23     | 6.20          | 0.01          |
| HOR-10-28B   | SRR628497                               | 13193                 | 6670                           | 331.1                              | 179           | 2.68%      | 1520                         | 2547.11     | 6.19          | 0.01          |
| HOR-10-28C   | SRR628498                               | 12352                 | 9192                           | 327.5                              | 574           | 6.24%      | 782                          | 1126.98     | 5.47          | 0.01          |
| HOR-10-28oil | SRR628499                               | 6263                  | 1710                           | 352.2                              | 96            | 5.61%      | 252                          | 500.11      | 4.45          | 0.02          |
| HOR-10-30A   | SRR628500                               | 9505                  | 7780                           | 386.4                              | 201           | 2.58%      | 884                          | 1133.27     | 5.81          | 0.01          |

| Sample Code | Small Read Archive Run Accession Number | Number of Seqs. (raw) | Number of Seqs. After Trimming | Average Seq. Length After Trimming | Chimeric Seq. | % Chimeric | OTUs (96% sequence identity) | Chao1 Index | Shannon Index | Simpson Index |
|-------------|-----------------------------------------|-----------------------|--------------------------------|------------------------------------|---------------|------------|------------------------------|-------------|---------------|---------------|
| HOR-10-30B  | SRR628501                               | 3560                  | 2876                           | 397.0                              | 66            | 2.29%      | 279                          | 340.42      | 4.91          | 0.01          |
| HOR-10-30C  | SRR628502                               | 3517                  | 2850                           | 407.4                              | 137           | 4.81%      | 125                          | 160.43      | 3.43          | 0.08          |
| HOR-10-33A  | SRR628503                               | 9311                  | 7728                           | 374.8                              | 452           | 5.85%      | 360                          | 447.42      | 4.39          | 0.03          |
| HOR-10-33B  | SRR628504                               | 5780                  | 4749                           | 388.1                              | 132           | 2.78%      | 158                          | 193.20      | 4.06          | 0.03          |
| HOR-10-33C  | SRR628505                               | 6307                  | 5189                           | 405.8                              | 135           | 2.60%      | 962                          | 1265.47     | 6.35          | 0.00          |
| HOR-10-34A  | SRR628506                               | 4537                  | 3543                           | 383.4                              | 136           | 3.84%      | 151                          | 189.15      | 4.26          | 0.02          |
| HOR-10-34B  | SRR628507                               | 5843                  | 4847                           | 402.9                              | 154           | 3.18%      | 744                          | 907.43      | 5.95          | 0.00          |
| HOR-10-34C  | SRR628508                               | 4623                  | 3824                           | 408.6                              | 62            | 1.62%      | 313                          | 418.11      | 3.81          | 0.10          |
| HOR-10-39A  | SRR628509                               | 6054                  | 4956                           | 389.5                              | 149           | 3.01%      | 392                          | 455.61      | 5.15          | 0.01          |
| HOR-10-39B  | SRR628510                               | 7001                  | 5577                           | 396.0                              | 114           | 2.04%      | 556                          | 635.44      | 5.53          | 0.01          |
| HOR-10-42A  | SRR628511                               | 5629                  | 4686                           | 397.3                              | 168           | 3.59%      | 614                          | 787.79      | 5.53          | 0.01          |
| HOR-10-42B  | SRR628512                               | 836                   | 79                             | 386.7                              | 3             | 3.80%      | 27                           | 65.25       | 2.79          | 0.08          |
| HOR-10-43A  | SRR628513                               | 6788                  | 5635                           | 405.3                              | 93            | 1.65%      | 482                          | 575.64      | 4.90          | 0.03          |
| HOR-10-53A  | SRR628526                               | 8043                  | 5204                           | 294.5                              | 144           | 2.77%      | 814                          | 1190.04     | 5.86          | 0.01          |
| HOR-10-53B  | SRR628527                               | 2906                  | 1764                           | 290.9                              | 29            | 1.64%      | 349                          | 544.15      | 5.03          | 0.02          |
| HOR-10-53C  | SRR628528                               | 3421                  | 2160                           | 292.9                              | 61            | 2.82%      | 481                          | 912.06      | 5.29          | 0.01          |
| HOR-10-54A  | SRR628529                               | 3749                  | 2376                           | 293.7                              | 46            | 1.94%      | 617                          | 1183.16     | 5.79          | 0.01          |
| HOR-10-54B  | SRR628530                               | 2918                  | 1837                           | 289.8                              | 44            | 2.40%      | 400                          | 637.54      | 5.31          | 0.01          |
| HOR-10-54C  | SRR628531                               | 6290                  | 4145                           | 297.7                              | 41            | 0.99%      | 940                          | 1447.61     | 6.09          | 0.00          |
| HOR-10-48A  | SRR628514                               | 14750                 | 10375                          | 337.5                              | 419           | 4.04%      | 2322                         | 3869.25     | 6.87          | 0.00          |
| HOR-10-48B  | SRR628515                               | 8343                  | 6205                           | 338.5                              | 520           | 8.38%      | 1614                         | 3075.47     | 6.47          | 0.00          |
| HOR-10-48C  | SRR628516                               | 4945                  | 3093                           | 373.9                              | 130           | 4.20%      | 885                          | 1957.39     | 5.81          | 0.01          |
| HOR-10-49A  | SRR628517                               | 12461                 | 5208                           | 367.4                              | 102           | 1.96%      | 1450                         | 2577.56     | 6.57          | 0.00          |
| HOR-10-49B  | SRR628518                               | 7136                  | 5095                           | 338.5                              | 196           | 3.85%      | 2022                         | 3900.76     | 7.15          | 0.00          |
| HOR-10-49C  | SRR628519                               | 15550                 | 9420                           | 343.7                              | 433           | 4.60%      | 3040                         | 5419.02     | 7.45          | 0.00          |
| HOR-10-50A  | SRR628520                               | 7143                  | 4052                           | 343.7                              | 111           | 2.74%      | 1450                         | 2368.99     | 6.76          | 0.00          |
| HOR-10-50B  | SRR628521                               | 9373                  | 6743                           | 331.5                              | 280           | 4.15%      | 1371                         | 2476.81     | 5.96          | 0.01          |
| HOR-10-50C  | SRR628522                               | 9018                  | 4995                           | 342.8                              | 191           | 3.82%      | 1877                         | 3623.76     | 7.02          | 0.00          |
| HOR-10-51A  | SRR628523                               | 8818                  | 6464                           | 341.6                              | 153           | 2.37%      | 2051                         | 3662.44     | 6.81          | 0.00          |
| HOR-10-51B  | SRR628524                               | 4563                  | 2902                           | 286.1                              | 69            | 2.38%      | 1201                         | 2911.32     | 6.58          | 0.00          |
| HOR-10-52A  | SRR628525                               | 12642                 | 9195                           | 342.1                              | 245           | 2.66%      | 473                          | 689.44      | 4.72          | 0.02          |
| HOR-11-73A  | SRR628559                               | 8303                  | 6084                           | 352.1                              | 183           | 3.01%      | 233                          | 258.63      | 4.59          | 0.02          |
| HOR-11-73B  | SRR628560                               | 4669                  | 3347                           | 360.1                              | 112           | 3.35%      | 214                          | 235.58      | 4.73          | 0.01          |
| HOR-11-73C  | SRR628561                               | 4234                  | 3001                           | 343.2                              | 41            | 1.37%      | 247                          | 296.88      | 4.83          | 0.01          |
| HOR-11-74A  | SRR628562                               | 4131                  | 3106                           | 358.0                              | 168           | 5.41%      | 292                          | 362.22      | 4.71          | 0.02          |
| HOR-11-74B  | SRR628563                               | 4258                  | 3153                           | 363.8                              | 53            | 1.68%      | 362                          | 463.13      | 5.18          | 0.01          |

Table S2

| Sample Code | Small Read Archive Run Accession Number | Number of Seqs. (raw) | Number of Seqs. After Trimming | Average Seq. Length After Trimming | Chimeric Seq. | % Chimeric | OTUs (96% sequence identity) | Chao1 Index | Shannon Index | Simpson Index |
|-------------|-----------------------------------------|-----------------------|--------------------------------|------------------------------------|---------------|------------|------------------------------|-------------|---------------|---------------|
| HOR-11-74C  | SRR628564                               | 11980                 | 8795                           | 356.7                              | 187           | 2.13%      | 419                          | 523.07      | 5.22          | 0.01          |
| HOR-11-75A  | SRR628565                               | 10258                 | 7692                           | 343.9                              | 575           | 7.48%      | 616                          | 827.50      | 5.36          | 0.01          |
| HOR-11-75B  | SRR628566                               | 7792                  | 5660                           | 358.5                              | 148           | 2.61%      | 1695                         | 2540.55     | 6.83          | 0.00          |
| HOR-11-75C  | SRR628567                               | 5759                  | 4117                           | 358.3                              | 186           | 4.52%      | 1545                         | 2783.59     | 6.87          | 0.00          |
| HOR-11-76A  | SRR628568                               | 9603                  | 6846                           | 349.2                              | 347           | 5.07%      | 991                          | 1398.82     | 5.92          | 0.01          |
| HOR-11-76B  | SRR628569                               | 11055                 | 8261                           | 360.6                              | 303           | 3.67%      | 482                          | 567.11      | 5.45          | 0.01          |
| HOR-11-76C  | SRR628570                               | 23770                 | 16999                          | 355.9                              | 721           | 4.24%      | 3020                         | 4032.04     | 7.30          | 0.00          |
| HOR-11-77A  | SRR628571                               | 7193                  | 5586                           | 344.9                              | 229           | 4.10%      | 361                          | 494.90      | 4.85          | 0.02          |
| HOR-11-77B  | SRR628572                               | 9706                  | 7028                           | 347.9                              | 418           | 5.95%      | 1296                         | 1913.60     | 6.08          | 0.01          |
| HOR-11-77C  | SRR628573                               | 9195                  | 6400                           | 342.7                              | 407           | 6.36%      | 1298                         | 2124.56     | 6.13          | 0.01          |
| HOR-11-78A  | SRR628574                               | 10172                 | 7388                           | 353.7                              | 1006          | 13.62%     | 875                          | 1179.45     | 5.75          | 0.01          |
| HOR-11-78B  | SRR628575                               | 7868                  | 5612                           | 348.7                              | 370           | 6.59%      | 1396                         | 2190.89     | 6.42          | 0.00          |
| HOR-11-78C  | SRR628576                               | 8565                  | 5900                           | 343.5                              | 421           | 7.14%      | 1221                         | 1921.42     | 6.12          | 0.01          |
| HOR-11-79A  | SRR628577                               | 9616                  | 6630                           | 341.3                              | 573           | 8.64%      | 868                          | 1384.38     | 5.60          | 0.01          |
| HOR-11-79B  | SRR628578                               | 8201                  | 5275                           | 334.1                              | 323           | 6.12%      | 1230                         | 2140.92     | 6.22          | 0.01          |
| HOR-11-79C  | SRR628579                               | 5987                  | 4050                           | 350.4                              | 275           | 6.79%      | 1200                         | 1894.43     | 6.41          | 0.00          |
| HOR-11-80A  | SRR628580                               | 7051                  | 5014                           | 336.2                              | 299           | 5.96%      | 955                          | 1599.92     | 5.68          | 0.01          |
| HOR-11-80B  | SRR628581                               | 6610                  | 4658                           | 341.9                              | 328           | 7.04%      | 1273                         | 2187.52     | 6.35          | 0.00          |
| HOR-11-58A  | SRR628532                               | 6877                  | 4740                           | 380.6                              | 288           | 6.08%      | 939                          | 1377.68     | 6.11          | 0.00          |
| HOR-11-58B  | SRR628533                               | 6053                  | 4500                           | 382.8                              | 312           | 6.93%      | 910                          | 1361.15     | 6.11          | 0.00          |
| HOR-11-58C  | SRR628534                               | 6726                  | 4977                           | 379.2                              | 268           | 5.38%      | 932                          | 1334.42     | 6.14          | 0.00          |
| HOR-11-59A  | SRR628535                               | 5981                  | 3822                           | 379.0                              | 176           | 4.60%      | 816                          | 1151.16     | 5.97          | 0.01          |
| HOR-11-59B  | SRR628536                               | 6620                  | 4879                           | 393.7                              | 119           | 2.44%      | 1172                         | 1801.61     | 6.35          | 0.00          |
| HOR-11-59C  | SRR628537                               | 7537                  | 5674                           | 389.2                              | 552           | 9.73%      | 1155                         | 1718.27     | 6.17          | 0.01          |
| HOR-11-60A  | SRR628538                               | 7642                  | 5141                           | 386.8                              | 309           | 6.01%      | 849                          | 1155.00     | 5.85          | 0.01          |
| HOR-11-60B  | SRR628539                               | 7240                  | 5388                           | 391.2                              | 110           | 2.04%      | 1147                         | 1741.24     | 6.21          | 0.01          |
| HOR-11-60C  | SRR628540                               | 6566                  | 5138                           | 400.8                              | 217           | 4.22%      | 766                          | 1200.47     | 4.89          | 0.05          |
| HOR-11-62A  | SRR628541                               | 8224                  | 6229                           | 406.5                              | 783           | 12.57%     | 468                          | 754.36      | 4.26          | 0.04          |
| HOR-11-62B  | SRR628542                               | 6667                  | 4799                           | 380.4                              | 653           | 13.61%     | 1127                         | 2020.26     | 6.04          | 0.01          |
| HOR-11-62C  | SRR628543                               | 7275                  | 4698                           | 375.7                              | 394           | 8.39%      | 953                          | 1642.66     | 5.79          | 0.01          |
| HOR-11-63A  | SRR628544                               | 6889                  | 4724                           | 401.9                              | 476           | 10.08%     | 342                          | 519.79      | 3.91          | 0.09          |
| HOR-11-63B  | SRR628545                               | 6709                  | 5224                           | 375.0                              | 458           | 8.77%      | 775                          | 1520.28     | 5.14          | 0.02          |
| HOR-11-63C  | SRR628546                               | 5562                  | 4060                           | 389.1                              | 314           | 7.73%      | 543                          | 963.15      | 4.67          | 0.03          |
| HOR-11-64A  | SRR628547                               | 11637                 | 8518                           | 349.3                              | 952           | 11.18%     | 787                          | 1200.19     | 5.28          | 0.02          |
| HOR-11-64B  | SRR628548                               | 7562                  | 5516                           | 344.7                              | 905           | 16.41%     | 1264                         | 2280.46     | 6.20          | 0.01          |
| HOR-11-64C  | SRR628549                               | 6634                  | 4572                           | 329.4                              | 515           | 11.26%     | 1117                         | 1983.33     | 6.14          | 0.01          |

Table S2

| Sample Code  | Small Read Archive Run Accession Number | Number of Seqs. (raw) | Number of Seqs. After Trimming | Average Seq. Length After Trimming | Chimeric Seq. | % Chimeric   | OTUs (96% sequence identity) | Chao1 Index | Shannon Index | Simpson Index |
|--------------|-----------------------------------------|-----------------------|--------------------------------|------------------------------------|---------------|--------------|------------------------------|-------------|---------------|---------------|
| HOR-11-65A   | SRR628550                               | 11957                 | 7244                           | 331.6                              | 432           | 5.96%        | 539                          | 720.22      | 5.01          | 0.01          |
| HOR-11-65B   | SRR628551                               | 11105                 | 8110                           | 355.5                              | 383           | 4.72%        | 1674                         | 2469.89     | 6.55          | 0.00          |
| HOR-11-65C   | SRR628552                               | 7597                  | 5370                           | 349.3                              | 176           | 3.28%        | 1210                         | 1926.09     | 6.14          | 0.01          |
| HOR-11-67A   | SRR628553                               | 8207                  | 5963                           | 349.3                              | 335           | 5.62%        | 2114                         | 3600.72     | 7.17          | 0.00          |
| HOR-11-67B   | SRR628554                               | 9597                  | 6954                           | 351.5                              | 345           | 4.96%        | 2297                         | 3801.25     | 7.20          | 0.00          |
| HOR-11-67C   | SRR628555                               | 7935                  | 5697                           | 346.8                              | 216           | 3.79%        | 1950                         | 3208.50     | 7.09          | 0.00          |
| HOR-11-68A   | SRR628556                               | 7859                  | 5716                           | 355.1                              | 287           | 5.02%        | 2169                         | 3669.43     | 7.24          | 0.00          |
| HOR-11-68B   | SRR628557                               | 7520                  | 5576                           | 355.2                              | 276           | 4.95%        | 2061                         | 3453.50     | 7.13          | 0.00          |
| HOR-11-68T   | SRR628558                               | 8259                  | 6411                           | 360.1                              | 746           | 11.64%       | 502                          | 746.22      | 4.76          | 0.02          |
| <b>TOTAL</b> |                                         | <b>871175</b>         | <b>581759</b>                  | <b>40451.97</b>                    | <b>28511</b>  | <b>4.90%</b> | -                            | -           | -             | -             |

Table S2
