# Supplementary material for: Regime Shift in Sandy Beach Microbial Communities following Deepwater Horizon Oil Spill Remediation Efforts
Source: PubMed Central journal article supplement (PMC4103866; doi:10.1371/journal.pone.0102934), 2014-07-18
Supplement: pone.0102934.s010.pdf [file pone.0102934.s010.pdf]

**Table S3. Summary of the number of pyrosequences obtained for each major taxonomic division for sediment samples collected from Grand Isle, Louisiana, 2010-2011.**

| Sample Number | Alphaproteobacteria | Betaproteobacteria | Gammaproteobacteria | Deltaproteobacteria | Epsilonproteobacteria | Acidobacteria | Actinobacteria | Bacteroidetes | Chloroflexi | Firmicutes | Gemmatimonadetes | Nitrospira | Planctomycetes | Proteobacteria | Spirachaetes | Verrucomicrobia | Cyanobacteria | TM7 | WS3 | Tenericutes | SR1 | Chrysiogenetes | OD1 | OP10 | BRC1 | Fibrobacteres | OP11 | UnclassifiedWS3 | UnclassifiedTM7 | UnclassifiedOD1 | UnclassifiedSR1 | UnclassifiedOP10 | UnclassifiedOP11 | Unclassified-BRC1 | Total |
|---------------|---------------------|--------------------|---------------------|---------------------|-----------------------|---------------|----------------|---------------|-------------|------------|------------------|------------|----------------|----------------|--------------|-----------------|---------------|-----|-----|-------------|-----|----------------|-----|------|------|---------------|------|-----------------|-----------------|-----------------|-----------------|------------------|------------------|-------------------|-------|
| HOR-10-18A    | 73                  | 88                 | 250                 | 4                   | 0                     | 0             | 14             | 130           | 81          | 546        | 0                | 0          | 0              | 415            | 0            | 2               | 51            | 0   | 0   | 2           | 0   | 0              | 0   | 0    | 0    | 0             | 0    | 0               | 0               | 0               | 0               | 0                | 0                | 0                 | 1369  |
| HOR-10-18B    | 84                  | 16                 | 38                  | 32                  | 1882                  | 368           | 406            | 202           | 0           | 2358       | 2                | 2          | 13             | 2052           | 3            | 0               | 34            | 0   | 0   | 0           | 0   | 0              | 0   | 0    | 0    | 0             | 0    | 0               | 0               | 0               | 0               | 0                | 0                | 0                 | 5463  |
| HOR-10-39A    | 355                 | 774                | 1113                | 67                  | 146                   | 82            | 202            | 435           | 19          | 1161       | 116              | 0          | 12             | 2455           | 2            | 163             | 88            | 19  | 0   | 1           | 0   | 0              | 0   | 13   | 0    | 0             | 0    | 0               | 19              | 0               | 0               | 13               | 0                | 0                 | 4792  |
| HOR-10-39B    | 374                 | 398                | 1238                | 254                 | 55                    | 325           | 243            | 702           | 151         | 1226       | 70               | 56         | 91             | 2319           | 5            | 96              | 66            | 8   | 3   | 0           | 0   | 3              | 2   | 3    | 0    | 0             | 0    | 3               | 8               | 2               | 0               | 3                | 0                | 0                 | 5462  |
| HOR-11-73A    | 2402                | 149                | 507                 | 64                  | 0                     | 0             | 1890           | 171           | 6           | 444        | 0                | 40         | 43             | 3122           | 0            | 9               | 19            | 111 | 0   | 0           | 0   | 0              | 0   | 0    | 0    | 0             | 0    | 0               | 111             | 0               | 0               | 0                | 0                | 0                 | 5901  |
| HOR-11-73B    | 826                 | 187                | 349                 | 64                  | 5                     | 76            | 1253           | 76            | 50          | 187        | 43               | 9          | 47             | 1428           | 0            | 53              | 0             | 5   | 0   | 0           | 0   | 0              | 0   | 6    | 0    | 0             | 0    | 0               | 5               | 0               | 0               | 6                | 0                | 0                 | 3235  |
| HOR-10-20A    | 264                 | 100                | 2239                | 261                 | 78                    | 604           | 539            | 413           | 50          | 2846       | 107              | 10         | 161            | 2942           | 0            | 142             | 604           | 0   | 3   | 0           | 2   | 0              | 0   | 0    | 0    | 0             | 0    | 3               | 0               | 0               | 2               | 0                | 0                | 0                 | 8514  |
| HOR-10-20B    | 313                 | 15                 | 1394                | 357                 | 60                    | 782           | 231            | 79            | 230         | 1190       | 63               | 39         | 277            | 2139           | 0            | 57              | 23            | 0   | 8   | 0           | 0   | 1              | 0   | 0    | 0    | 0             | 0    | 8               | 0               | 0               | 0               | 0                | 0                | 0                 | 5290  |
| HOR-10-42A    | 285                 | 745                | 1736                | 267                 | 17                    | 288           | 113            | 248           | 169         | 354        | 29               | 10         | 111            | 3050           | 5            | 37              | 34            | 3   | 8   | 1           | 0   | 0              | 0   | 0    | 6    | 0             | 0    | 8               | 3               | 0               | 0               | 0                | 0                | 6                 | 4503  |
| HOR-11-74A    | 424                 | 143                | 89                  | 38                  | 0                     | 0             | 1722           | 133           | 11          | 257        | 11               | 0          | 3              | 694            | 0            | 1               | 0             | 31  | 0   | 9           | 0   | 0              | 0   | 0    | 0    | 0             | 0    | 0               | 31              | 0               | 0               | 0                | 0                | 0                 | 2596  |
| HOR-11-74B    | 515                 | 188                | 192                 | 187                 | 4                     | 303           | 888            | 70            | 131         | 108        | 122              | 5          | 69             | 1086           | 16           | 108             | 13            | 141 | 0   | 0           | 0   | 0              | 3   | 0    | 1    | 0             | 0    | 0               | 141             | 3               | 0               | 0                | 0                | 1                 | 3100  |
| HOR-11-75A    | 1615                | 53                 | 3819                | 46                  | 3                     | 0             | 147            | 740           | 22          | 112        | 3                | 3          | 89             | 5536           | 1            | 28              | 326           | 15  | 0   | 0           | 0   | 0              | 0   | 0    | 1    | 0             | 0    | 0               | 15              | 0               | 0               | 0                | 0                | 1                 | 7111  |
| HOR-11-75B    | 876                 | 653                | 802                 | 653                 | 18                    | 531           | 204            | 96            | 328         | 209        | 100              | 476        | 209            | 3002           | 15           | 104             | 17            | 17  | 6   | 0           | 0   | 0              | 0   | 1    | 1    | 0             | 0    | 6               | 17              | 0               | 0               | 1                | 0                | 1                 | 5504  |
| HOR-11-76A    | 2266                | 25                 | 826                 | 66                  | 5                     | 0             | 12             | 1040          | 12          | 41         | 2                | 1          | 63             | 3188           | 3            | 136             | 1936          | 0   | 0   | 0           | 0   | 1              | 0   | 0    | 0    | 0             | 0    | 0               | 0               | 0               | 0               | 0                | 0                | 0                 | 6499  |
| HOR-11-76B    | 1512                | 274                | 2458                | 618                 | 19                    | 667           | 797            | 173           | 177         | 289        | 16               | 33         | 202            | 4881           | 28           | 19              | 305           | 111 | 12  | 2           | 0   | 2              | 4   | 0    | 0    | 0             | 0    | 12              | 111             | 4               | 0               | 0                | 0                | 0                 | 7946  |
| HOR-11-77A    | 1158                | 84                 | 656                 | 240                 | 17                    | 0             | 604            | 41            | 307         | 1014       | 0                | 4          | 20             | 2155           | 3            | 208             | 864           | 0   | 0   | 3           | 0   | 0              | 0   | 0    | 0    | 0             | 0    | 0               | 0               | 0               | 0               | 0                | 0                | 0                 | 5356  |
| HOR-11-77B    | 765                 | 45                 | 3301                | 490                 | 390                   | 150           | 315            | 384           | 167         | 254        | 26               | 13         | 88             | 4991           | 47           | 24              | 7             | 7   | 4   | 17          | 0   | 0              | 2   | 0    | 0    | 0             | 0    | 4               | 7               | 2               | 0               | 0                | 0                | 0                 | 6608  |
| HOR-11-78A    | 2981                | 21                 | 2285                | 63                  | 4                     | 0             | 62             | 686           | 12          | 51         | 1                | 4          | 5              | 5354           | 0            | 53              | 129           | 0   | 0   | 0           | 0   | 1              | 1   | 0    | 0    | 0             | 0    | 0               | 1               | 0               | 0               | 0                | 0                | 0                 | 6382  |
| HOR-11-78B    | 726                 | 70                 | 1816                | 9                   | 4                     | 403           | 326            | 517           | 182         | 378        | 65               | 29         | 117            | 3067           | 5            | 34              | 8             | 4   | 2   | 1           | 0   | 0              | 0   | 0    | 0    | 0             | 2    | 4               | 0               | 0               | 0               | 0                | 0                | 0                 | 5236  |
| HOR-11-79A    | 1213                | 34                 | 2592                | 116                 | 0                     | 0             | 69             | 1689          | 52          | 91         | 17               | 4          | 34             | 3955           | 5            | 12              | 40            | 1   | 0   | 0           | 0   | 0              | 0   | 0    | 0    | 0             | 0    | 0               | 1               | 0               | 0               | 0                | 0                | 0                 | 6057  |
| HOR-11-79B    | 663                 | 55                 | 1233                | 472                 | 5                     | 447           | 222            | 1089          | 189         | 350        | 69               | 13         | 117            | 2428           | 4            | 33              | 63            | 1   | 10  | 2           | 0   | 0              | 0   | 0    | 0    | 0             | 10   | 1               | 0               | 0               | 0               | 0                | 0                | 0                 | 4952  |

| Sample Number | <i>Alphaproteobacteria</i> | <i>Betaproteobacteria</i> | <i>Gammaproteobacteria</i> | <i>Deltaproteobacteria</i> | <i>Epsilonproteobacteria</i> | <i>Acidobacteria</i> | <i>Actinobacteria</i> | <i>Bacteroidetes</i> | <i>Chloroflexi</i> | <i>Firmicutes</i> | <i>Gemmatimonadetes</i> | <i>Nitrospira</i> | <i>Planctomycetes</i> | <i>Proteobacteria</i> | <i>Spirochaetes</i> | <i>Verruconicrobia</i> | <i>Cyanobacteria</i> | TM7 | WS3 | <i>Tenericutes</i> | SR1 | <i>Chrysiogenetes</i> | OD1 | OP10 | BRC1 | <i>Fibrobacteres</i> | OP11 | UnclassifiedWS3 | UnclassifiedTM7 | UnclassifiedOD1 | UnclassifiedSR1 | UnclassifiedOP10 | UnclassifiedOP11 | Unclassified-BRC1 | Total |
|---------------|----------------------------|---------------------------|----------------------------|----------------------------|------------------------------|----------------------|-----------------------|----------------------|--------------------|-------------------|-------------------------|-------------------|-----------------------|-----------------------|---------------------|------------------------|----------------------|-----|-----|--------------------|-----|-----------------------|-----|------|------|----------------------|------|-----------------|-----------------|-----------------|-----------------|------------------|------------------|-------------------|-------|
| HOR-10-21B    | 112                        | 54                        | 498                        | 123                        | 33                           | 265                  | 80                    | 472                  | 145                | 5694              | 76                      | 0                 | 111                   | 820                   | 0                   | 5                      | 0                    | 0   | 10  | 0                  | 0   | 0                     | 7   | 0    | 0    | 0                    | 0    | 10              | 0               | 7               | 0               | 0                | 0                | 0                 | 7816  |
| HOR-10-43A    | 367                        | 61                        | 1308                       | 299                        | 82                           | 170                  | 55                    | 332                  | 106                | 2330              | 9                       | 0                 | 62                    | 2117                  | 13                  | 31                     | 216                  | 0   | 11  | 21                 | 0   | 0                     | 0   | 0    | 0    | 2                    | 0    | 11              | 0               | 0               | 0               | 0                | 0                | 0                 | 5540  |
| HOR-11-80A    | 431                        | 4                         | 1886                       | 223                        | 6                            | 163                  | 167                   | 810                  | 96                 | 566               | 32                      | 4                 | 105                   | 2620                  | 3                   | 46                     | 40                   | 2   | 6   | 8                  | 0   | 0                     | 0   | 0    | 0    | 0                    | 6    | 2               | 0               | 0               | 0               | 0                | 0                | 4712              |       |
