# Supplementary material for: Regime Shift in Sandy Beach Microbial Communities following Deepwater Horizon Oil Spill Remediation Efforts
Source: PubMed Central journal article supplement (PMC4103866; doi:10.1371/journal.pone.0102934), 2014-07-18
Supplement: pone.0102934.s011.pdf [file pone.0102934.s011.pdf]

| Sample Number | Alphaproteobacteria | Betaproteobacteria | Gammaproteobacteria | Deltaproteobacteria | Epsilonproteobacteria | Proteobacteria | Acidobacteria | Actinobacteria | Aquificae | Bacteroidetes | Caldiserica | Chlamydiae | Chlorobi | Chloroflexi | Deferribacteres | Deinococcus-Thermus | Firmicutes | Fusobacteria | Gemmatimonadete | Lentishaeae | Nitrospira | Planctomycetes | Spirochaetes | Synergistales | Thermodesulfobacteria | Thermotogae | Verrucomicrobia | Unclassified Bacteria_Incertae_sedis | Cyanobacteria | Candidate Division TM7 | Candidate Division WS3 | Tenericutes | Candidate Division SR1 | Chrysiogenetes | Candidate Division OD1 | Candidate Division OP10 | Candidate Division BRC1 | Fibrobacteres | Candidate Division OP11 | Unclassified Candidate Division TM7 | Unclassified Candidate Division WS3 | Unclassified Candidate Division OD1 | Unclassified Candidate Division SR1 | Unclassified Candidate Division OP10 | Unclassified Candidate Division OP11 | Unclassified Candidate Division BRC1 | Total |      |      |
|---------------|---------------------|--------------------|---------------------|---------------------|-----------------------|----------------|---------------|----------------|-----------|---------------|-------------|------------|----------|-------------|-----------------|---------------------|------------|--------------|-----------------|-------------|------------|----------------|--------------|---------------|-----------------------|-------------|-----------------|--------------------------------------|---------------|------------------------|------------------------|-------------|------------------------|----------------|------------------------|-------------------------|-------------------------|---------------|-------------------------|-------------------------------------|-------------------------------------|-------------------------------------|-------------------------------------|--------------------------------------|--------------------------------------|--------------------------------------|-------|------|------|
| HOR-10-50C    | 605                 | 70                 | 1310                | 327                 | 11                    | 2323           | 334           | 308            | 7         | 513           | 0           | 6          | 4        | 151         | 37              | 9                   | 106        | 0            | 18              | 49          | 85         | 310            | 4            | 4             | 1                     | 2           | 48              | 0                                    | 463           | 13                     | 4                      | 0           | 0                      | 0              | 1                      | 0                       | 1                       | 0             | 0                       | 0                                   | 13                                  | 4                                   | 1                                   | 0                                    | 0                                    | 0                                    | 0     | 1    | 4801 |
| HOR-10-51A    | 579                 | 83                 | 1504                | 377                 | 13                    | 2556           | 348           | 344            | 8         | 478           | 1           | 3          | 2        | 177         | 32              | 7                   | 116        | 0            | 37              | 141         | 79         | 462            | 11           | 2             | 10                    | 6           | 48              | 1                                    | 1411          | 7                      | 10                     | 1           | 0                      | 0              | 0                      | 0                       | 0                       | 0             | 0                       | 0                                   | 7                                   | 10                                  | 0                                   | 0                                    | 0                                    | 0                                    | 0     | 0    | 6298 |
| HOR-10-51B    | 348                 | 33                 | 668                 | 855                 | 6                     | 1910           | 200           | 193            | 6         | 269           | 0           | 2          | 5        | 105         | 18              | 5                   | 52         | 2            | 15              | 31          | 43         | 166            | 3            | 0             | 2                     | 1           | 38              | 0                                    | 420           | 1                      | 2                      | 0           | 0                      | 0              | 0                      | 1                       | 0                       | 0             | 0                       | 0                                   | 0                                   | 1                                   | 2                                   | 1                                    | 0                                    | 0                                    | 0     | 0    | 2830 |
| HOR-10-52A    | 3958                | 770                | 67                  | 315                 | 2                     | 5112           | 624           | 1121           | 1         | 1581          | 0           | 0          | 1        | 34          | 0               | 25                  | 117        | 15           | 111             | 1           | 3          | 44             | 0            | 0             | 0                     | 0           | 3               | 21                                   | 13            | 34                     | 0                      | 4           | 0                      | 0              | 4                      | 81                      | 0                       | 0             | 0                       | 0                                   | 34                                  | 0                                   | 4                                   | 0                                    | 81                                   | 0                                    | 0     | 0    | 8650 |
| HOR-11-58A    | 949                 | 341                | 183                 | 110                 | 5                     | 1588           | 331           | 1321           | 11        | 438           | 1           | 1          | 2        | 89          | 0               | 53                  | 210        | 2            | 99              | 3           | 16         | 137            | 1            | 2             | 7                     | 0           | 43              | 3                                    | 76            | 2                      | 3                      | 0           | 0                      | 0              | 0                      | 0                       | 13                      | 0             | 0                       | 0                                   | 2                                   | 3                                   | 0                                   | 0                                    | 13                                   | 0                                    | 0     | 0    | 4452 |
| HOR-11-58B    | 1063                | 386                | 213                 | 114                 | 15                    | 1791           | 420           | 907            | 36        | 284           | 1           | 2          | 0        | 107         | 0               | 19                  | 129        | 0            | 224             | 1           | 9          | 161            | 0            | 1             | 7                     | 0           | 35              | 9                                    | 10            | 28                     | 0                      | 0           | 0                      | 0              | 1                      | 1                       | 5                       | 0             | 0                       | 0                                   | 28                                  | 0                                   | 1                                   | 0                                    | 1                                    | 0                                    | 5     | 4188 |      |
| HOR-11-58C    | 703                 | 304                | 74                  | 129                 | 15                    | 1225           | 602           | 1675           | 12        | 332           | 6           | 0          | 0        | 187         | 1               | 57                  | 89         | 0            | 270             | 4           | 7          | 130            | 0            | 4             | 4                     | 2           | 74              | 8                                    | 6             | 7                      | 0                      | 2           | 0                      | 0              | 0                      | 4                       | 1                       | 0             | 0                       | 7                                   | 0                                   | 0                                   | 0                                   | 4                                    | 0                                    | 1                                    | 4709  |      |      |
| HOR-11-59A    | 819                 | 169                | 117                 | 123                 | 8                     | 1236           | 327           | 1031           | 10        | 359           | 0           | 1          | 5        | 90          | 1               | 62                  | 134        | 0            | 71              | 4           | 11         | 184            | 1            | 2             | 9                     | 4           | 16              | 1                                    | 79            | 2                      | 1                      | 0           | 0                      | 0              | 0                      | 0                       | 3                       | 1             | 0                       | 0                                   | 2                                   | 1                                   | 0                                   | 0                                    | 3                                    | 0                                    | 1     | 3645 |      |
| HOR-11-59B    | 597                 | 306                | 215                 | 308                 | 6                     | 1432           | 1580          | 546            | 16        | 56            | 24          | 2          | 4        | 265         | 5               | 7                   | 309        | 0            | 38              | 7           | 29         | 306            | 0            | 0             | 23                    | 28          | 20              | 0                                    | 3             | 5                      | 39                     | 0           | 0                      | 0              | 0                      | 4                       | 0                       | 1             | 0                       | 5                                   | 39                                  | 0                                   | 0                                   | 4                                    | 0                                    | 0                                    | 0     | 4749 |      |
| HOR-11-59C    | 682                 | 1066               | 323                 | 261                 | 8                     | 2340           | 1190          | 567            | 10        | 62            | 6           | 1          | 1        | 225         | 4               | 3                   | 369        | 0            | 24              | 2           | 15         | 189            | 1            | 1             | 28                    | 11          | 11              | 1                                    | 2             | 14                     | 12                     | 5           | 0                      | 0              | 2                      | 9                       | 0                       | 9             | 1                       | 14                                  | 12                                  | 2                                   | 0                                   | 9                                    | 1                                    | 0                                    | 5115  |      |      |
| HOR-11-60A    | 1040                | 158                | 194                 | 164                 | 3                     | 1559           | 562           | 1456           | 12        | 338           | 0           | 0          | 0        | 162         | 0               | 16                  | 245        | 0            | 30              | 2           | 7          | 128            | 0            | 2             | 8                     | 3           | 25              | 0                                    | 260           | 12                     | 3                      | 0           | 0                      | 0              | 0                      | 1                       | 0                       | 0             | 0                       | 0                                   | 12                                  | 3                                   | 0                                   | 0                                    | 1                                    | 0                                    | 0     | 0    | 4831 |
| HOR-11-60B    | 446                 | 342                | 379                 | 334                 | 2                     | 1503           | 1124          | 1269           | 15        | 112           | 2           | 1          | 7        | 185         | 1               | 10                  | 179        | 1            | 88              | 26          | 60         | 266            | 0            | 1             | 11                    | 8           | 77              | 0                                    | 260           | 5                      | 63                     | 0           | 0                      | 0              | 0                      | 2                       | 0                       | 0             | 0                       | 5                                   | 63                                  | 0                                   | 0                                   | 2                                    | 0                                    | 0                                    | 0     | 5276 |      |
| HOR-11-60C    | 167                 | 61                 | 1243                | 173                 | 3                     | 1647           | 645           | 146            | 4         | 43            | 1           | 3          | 4        | 82          | 1               | 0                   | 2045       | 0            | 47              | 22          | 48         | 102            | 0            | 3             | 8                     | 0           | 26              | 0                                    | 22            | 0                      | 10                     | 0           | 0                      | 0              | 0                      | 0                       | 3                       | 1             | 1                       | 4                                   | 0                                   | 10                                  | 0                                   | 0                                    | 3                                    | 4                                    | 1     | 4918 |      |
| HOR-11-62A    | 512                 | 16                 | 105                 | 19                  | 0                     | 652            | 0             | 79             | 2         | 204           | 0           | 1          | 0        | 13          | 0               | 19                  | 4046       | 0            | 0               | 6           | 0          | 43             | 0            | 0             | 1                     | 0           | 35              | 0                                    | 335           | 0                      | 0                      | 8           | 2                      | 0              | 0                      | 0                       | 0                       | 0             | 0                       | 0                                   | 0                                   | 0                                   | 0                                   | 0                                    | 2                                    | 0                                    | 0     | 0    | 5446 |
| HOR-11-62B    | 179                 | 68                 | 859                 | 439                 | 1128                  | 2673           | 75            | 89             | 2         | 403           | 1           | 5          | 24       | 233         | 48              | 7                   | 213        | 16           | 3               | 52          | 28         | 109            | 77           | 0             | 6                     | 2           | 17              | 1                                    | 30            | 3                      | 15                     | 4           | 0                      | 0              | 7                      | 0                       | 0                       | 0             | 0                       | 0                                   | 3                                   | 15                                  | 7                                   | 0                                    | 0                                    | 0                                    | 0     | 4143 |      |
| HOR-11-62C    | 343                 | 88                 | 1276                | 413                 | 234                   | 2354           | 101           | 112            | 2         | 887           | 1           | 11         | 71       | 204         | 39              | 10                  | 151        | 34           | 7               | 48          | 3          | 106            | 73           | 1             | 5                     | 0           | 25              | 0                                    | 33            | 4                      | 10                     | 5           | 0                      | 1              | 4                      | 0                       | 0                       | 0             | 0                       | 4                                   | 10                                  | 4                                   | 0                                   | 0                                    | 0                                    | 0                                    | 4302  |      |      |
| HOR-11-63A    | 641                 | 320                | 226                 | 8                   | 0                     | 1195           | 2             | 371            | 1         | 435           | 0           | 0          | 0        | 8           | 0               | 4                   | 2059       | 0            | 0               | 6           | 0          | 29             | 0            | 0             | 1                     | 0           | 7               | 0                                    | 129           | 0                      | 0                      | 1           | 0                      | 0              | 0                      | 0                       | 0                       | 0             | 0                       | 0                                   | 0                                   | 0                                   | 0                                   | 0                                    | 0                                    | 0                                    | 0     | 0    | 4248 |
| HOR-11-63B    | 137                 | 133                | 439                 | 297                 | 2465                  | 3471           | 87            | 28             | 0         | 462           | 0           | 3          | 24       | 35          | 39              | 1                   | 463        | 0            | 3               | 20          | 17         | 70             | 9            | 0             | 0                     | 0           | 14              | 1                                    | 13            | 0                      | 0                      | 0           | 3                      | 0              | 1                      | 0                       | 2                       | 0             | 0                       | 0                                   | 0                                   | 1                                   | 3                                   | 0                                    | 0                                    | 2                                    | 4766  |      |      |
| HOR-11-63C    | 150                 | 34                 | 364                 | 196                 | 2282                  | 3026           | 53            | 33             | 2         | 260           | 0           | 2          | 7        | 35          | 9               | 4                   | 186        | 4            | 1               | 6           | 5          | 56             | 12           | 0             | 1                     | 1           | 11              | 0                                    | 5             | 1                      | 0                      | 25          | 0                      | 0              | 0                      | 0                       | 1                       | 0             | 0                       | 1                                   | 0                                   | 0                                   | 0                                   | 0                                    | 1                                    | 3746                                 |       |      |      |
| HOR-11-64A    | 2091                | 120                | 744                 | 68                  | 0                     | 3023           | 3             | 227            | 0         | 694           | 0           | 1          | 0        | 12          | 2               | 64                  | 3066       | 0            | 0               | 14          | 0          | 82             | 12           | 3             | 1                     | 0           | 196             | 0                                    | 232           | 0                      | 0                      | 1           | 3                      | 0              | 1                      | 0                       | 0                       | 0             | 0                       | 0                                   | 0                                   | 1                                   | 3                                   | 0                                    | 0                                    | 0                                    | 0     | 7565 |      |
| HOR-11-64B    | 877                 | 16                 | 1691                | 295                 | 23                    | 2902           | 72            | 103            | 6         | 1076          | 0           | 2          | 4        | 41          | 12              | 1                   | 153        | 20           | 5               | 20          | 11         | 89             | 6            | 2             | 3                     | 0           | 52              | 0                                    | 15            | 0                      | 3                      | 11          | 0                      | 0              | 2                      | 0                       | 0                       | 0             | 0                       | 0                                   | 0                                   | 0                                   | 3                                   | 2                                    | 0                                    | 0                                    | 0     | 4611 |      |
| HOR-11-64C    | 631                 | 40                 | 1130                | 131                 | 3                     | 1935           | 48            | 96             | 5         | 1696          | 0           | 3          | 4        | 39          | 11              | 0                   | 62         | 0            | 6               | 18          | 15         | 72             | 7            | 1             | 0                     | 0           | 20              | 0                                    | 11            | 3                      | 4                      | 0           | 0                      | 0              | 1                      | 0                       | 0                       | 0             | 0                       | 3                                   | 4                                   | 1                                   | 0                                   | 0                                    | 0                                    | 0                                    | 4057  |      |      |
| HOR-11-65A    | 2526                | 531                | 145                 | 131                 | 0                     | 3333           | 22            | 583            | 5         | 2440          | 0           | 0          | 0        | 10          | 0               | 9                   | 259        | 0            | 21              | 0           | 9          | 75             | 0            | 0             | 1                     | 0           | 2               | 0                                    | 5             | 11                     | 0                      | 0           | 0                      | 0              | 0                      | 0                       | 0                       | 0             | 0                       | 0                                   | 0                                   | 11                                  | 0                                   | 0                                    | 0                                    | 0                                    | 0     | 6811 |      |
| HOR-11-65B    | 1005                | 538                | 2278                | 364                 | 13                    | 4198           | 724           | 278            | 5         | 801           | 1           | 16         | 16       | 95          | 10              | 17                  | 176        | 0            | 145             | 56          | 125        | 224            | 2            | 1             | 7                     | 1           | 278             | 0                                    | 0             | 533                    | 8                      | 0           | 0                      | 0              | 4                      | 2                       | 3                       | 0             | 0                       | 533                                 | 8                                   | 4                                   | 0                                   | 2                                    | 0                                    | 3                                    | 7726  |      |      |

Tables S4

| Sample Number | <i>Alphaproteobacteria</i> | <i>Betaproteobacteria</i> | <i>Gammaproteobacteria</i> | <i>Deltaproteobacteria</i> | <i>Epsilonproteobacteria</i> | Proteobacteria | Acidobacteria | Actinobacteria | Aquificae | Bacteroidetes | Caldiserica | Chlamydiae | Chlorobi | Chloroflexi | Deferribacteres | Deinococcus-Thermus | Firmicutes | Fusobacteria | Gemmatimonadete | Lentishaeae | Nitrospira | Planctomycetes | Spirochaetes | Synergistales | Thermodesulfobacteria | Thermotogae | Verrucomicrobia | Unclassified Bacteria_Incertae_sedis | Cyanobacteria | Candidate Division TM7 | Candidate Division WS3 | Tenericutes | Candidate Division SR1 | Chrysiogenetes | Candidate Division OD1 | Candidate Division OP10 | Candidate Division BRC1 | Fibrobacteres | Candidate Division OP11 | Unclassified Candidate Division TM7 | Unclassified Candidate Division WS3 | Unclassified Candidate Division OD1 | Unclassified Candidate Division SR1 | Unclassified Candidate Division OP10 | Unclassified Candidate Division OP11 | Unclassified Candidate Division BRC1 | Total |
|---------------|----------------------------|---------------------------|----------------------------|----------------------------|------------------------------|----------------|---------------|----------------|-----------|---------------|-------------|------------|----------|-------------|-----------------|---------------------|------------|--------------|-----------------|-------------|------------|----------------|--------------|---------------|-----------------------|-------------|-----------------|--------------------------------------|---------------|------------------------|------------------------|-------------|------------------------|----------------|------------------------|-------------------------|-------------------------|---------------|-------------------------|-------------------------------------|-------------------------------------|-------------------------------------|-------------------------------------|--------------------------------------|--------------------------------------|--------------------------------------|-------|
| HOR-11-65C    | 599                        | 274                       | 1321                       | 360                        | 11                           | 2565           | 466           | 163            | 2         | 1239          | 1           | 4          | 12       | 56          | 3               | 5                   | 115        | 0            | 81              | 29          | 90         | 186            | 0            | 0             | 5                     | 0           | 78              | 3                                    | 5             | 67                     | 6                      | 1           | 0                      | 0              | 0                      | 10                      | 1                       | 0             | 0                       | 67                                  | 6                                   | 0                                   | 0                                   | 10                                   | 0                                    | 1                                    | 5193  |
| HOR-11-67A    | 688                        | 90                        | 1698                       | 618                        | 12                           | 3106           | 499           | 309            | 6         | 531           | 0           | 9          | 5        | 145         | 52              | 4                   | 116        | 1            | 45              | 64          | 135        | 303            | 20           | 1             | 5                     | 5           | 61              | 3                                    | 188           | 3                      | 8                      | 0           | 0                      | 1              | 1                      | 0                       | 1                       | 0             | 0                       | 3                                   | 8                                   | 1                                   | 0                                   | 0                                    | 0                                    | 1                                    | 5627  |
| HOR-11-67B    | 644                        | 86                        | 2196                       | 677                        | 18                           | 3621           | 445           | 351            | 7         | 685           | 0           | 10         | 9        | 187         | 69              | 13                  | 137        | 0            | 55              | 74          | 142        | 368            | 17           | 12            | 5                     | 3           | 59              | 1                                    | 324           | 4                      | 4                      | 0           | 0                      | 2              | 0                      | 1                       | 0                       | 0             | 4                       | 4                                   | 0                                   | 0                                   | 1                                   | 0                                    | 0                                    | 6605                                 |       |
| HOR-11-67C    | 467                        | 79                        | 1710                       | 715                        | 9                            | 2980           | 441           | 280            | 6         | 495           | 3           | 7          | 4        | 155         | 47              | 6                   | 133        | 5            | 59              | 80          | 127        | 360            | 16           | 10            | 12                    | 3           | 52              | 2                                    | 186           | 2                      | 4                      | 0           | 0                      | 0              | 2                      | 0                       | 3                       | 0             | 0                       | 2                                   | 4                                   | 2                                   | 0                                   | 0                                    | 3                                    | 5480                                 |       |
| HOR-11-68A    | 557                        | 78                        | 1731                       | 711                        | 20                           | 3097           | 376           | 322            | 6         | 360           | 1           | 11         | 2        | 164         | 59              | 5                   | 117        | 5            | 50              | 53          | 142        | 332            | 20           | 5             | 5                     | 3           | 61              | 3                                    | 212           | 0                      | 11                     | 0           | 0                      | 2              | 2                      | 0                       | 0                       | 0             | 0                       | 0                                   | 11                                  | 2                                   | 0                                   | 0                                    | 0                                    | 0                                    | 5426  |
| HOR-11-68B    | 463                        | 77                        | 1771                       | 686                        | 22                           | 3019           | 359           | 272            | 4         | 455           | 0           | 8          | 5        | 172         | 54              | 7                   | 117        | 1            | 62              | 65          | 141        | 330            | 16           | 7             | 3                     | 6           | 29              | 1                                    | 156           | 1                      | 7                      | 0           | 0                      | 0              | 0                      | 0                       | 1                       | 0             | 0                       | 1                                   | 7                                   | 0                                   | 0                                   | 0                                    | 0                                    | 1                                    | 5298  |
| HOR-11-68T    | 1126                       | 12                        | 3805                       | 222                        | 122                          | 5287           | 72            | 34             | 2         | 75            | 0           | 0          | 5        | 47          | 7               | 2                   | 43         | 0            | 4               | 7           | 0          | 38             | 10           | 4             | 0                     | 0           | 2               | 1                                    | 14            | 1                      | 10                     | 0           | 0                      | 0              | 0                      | 0                       | 0                       | 0             | 0                       | 0                                   | 1                                   | 10                                  | 0                                   | 0                                    | 0                                    | 0                                    | 5665  |
